# Supplementary material for: Social avoidance behavior in male tree shrews and prosocial behavior in male mice toward unfamiliar conspecifics in the laboratory
Source: PubMed Central journal article supplement — Zool Res. 2020 May 18;41(3):258–72. doi: 10.24272/j.issn.2095-8137.2020.034 (PMC7231478; doi:10.24272/j.issn.2095-8137.2020.034), 2020-05-18
Supplement: zr-41-3-258-S1.pdf [file zr-41-3-258-S1.pdf]

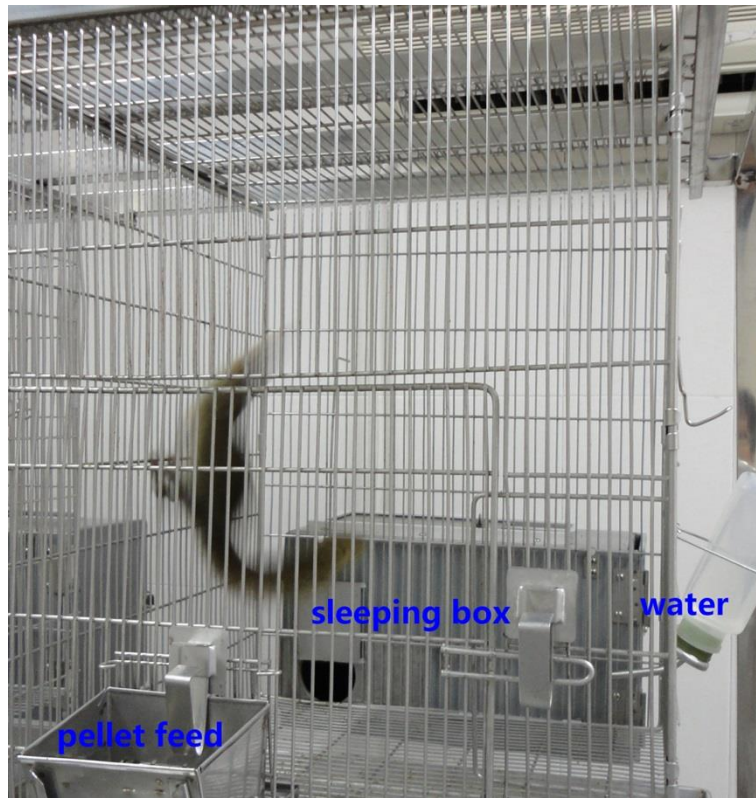

**Supplement Figure S1** Tree shrew in the home cage  
Outside the cages were sleeping boxes (covered and dark place) closed with a slider.
